# Supplementary material
Source: MDPI journal article supplement (https://www.mdpi.com/2073-4441/14/13/1999)
Supplement: s1 [file s1]

# Supplementary Material

## Distribution and ecological risk assessment of Pharmaceuticals and personal care products in sediments of North Canal, China

Shasha Pei, Binghua Li, Boxin Wang, Jingchao Liu, Xuanying Song

**Table S1.** Physiochemical properties of the antibiotics considered in the study

| PPCPs            | Abbreviation | CAS No   | Molecular Formula                                               | Structure                                                                            | MW (g/mol) | Water Solubility (mg/L) | vapor pressure (mm Hg) | LogK <sub>ow</sub> |
|------------------|--------------|----------|-----------------------------------------------------------------|--------------------------------------------------------------------------------------|------------|-------------------------|------------------------|--------------------|
| Sulfamethoxazole | SMX          | 723-46-6 | C <sub>10</sub> H <sub>11</sub> N <sub>3</sub> O <sub>3</sub> S | 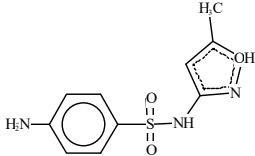   | 253.28     | 3942                    | 1.3×10 <sup>-7</sup>   | 0.89               |
| Trimethoprim     | TMP          | 738-70-5 | C <sub>14</sub> H <sub>18</sub> N <sub>4</sub> O <sub>3</sub>   |  | 290.32     | 2334                    | 7.52×10 <sup>-9</sup>  | 0.91               |

|           |     |            |                                                               |                                                                                     |        |       |                       |       |
|-----------|-----|------------|---------------------------------------------------------------|-------------------------------------------------------------------------------------|--------|-------|-----------------------|-------|
| Caffeine  | CAF | 58-08-2    | C <sub>8</sub> H <sub>10</sub> N <sub>4</sub> O <sub>2</sub>  | 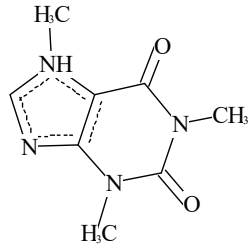 | 194.19 | 2632  | $7.33 \times 10^{-9}$ | -0.07 |
| Ibuprofen | IBU | 15687-27-1 | C <sub>13</sub> H <sub>18</sub> O <sub>2</sub>                |   | 206.29 | 41.05 | $1.86 \times 10^{-4}$ | 3.97  |
| Triclosan | TCS | 3380-34-5  | C <sub>12</sub> H <sub>7</sub> Cl <sub>3</sub> O <sub>2</sub> |  | 289.55 | 4.621 | $4.65 \times 10^{-6}$ | 4.76  |

**Table S2** Limit of detection (LOD) and limit of quantification (LOQ) for the the target compounds.

| Compounds | Water      |            | Sediment   |            |
|-----------|------------|------------|------------|------------|
|           | LOD (ng/L) | LOQ (ng/L) | LOD (ng/g) | LOQ (ng/g) |
| SMX       | 0.09       | 0.3        | 0.05       | 0.2        |
| TMP       | 0.01       | 0.03       | 0.3        | 1          |
| CAF       | 0.2        | 0.6        | 0.06       | 0.2        |
| IBF       | 1.1        | 3.3        | 0.01       | 0.03       |
| TCS       | 0.3        | 0.8        | 0.1        | 0.3        |

<sup>a</sup> The linear range was from 1 to 500 µg/L for all target compounds.

**TableS3.** Toxicity data used to derivate the predicted no effect concentrations (PNECs) in this study. Bold is the lowest NOEC.

| Name | Organism                                   | Duration   | End Pt      | Predicted<br>mg/L (ppm) |
|------|--------------------------------------------|------------|-------------|-------------------------|
| TMP  | Hydra attenuata[1]                         | 96-h       | LC50        | >100                    |
|      |                                            | 96-h       | EC50        | NC                      |
|      | Anabaena variabilis NIES-23[2]             |            | EC50        | 11                      |
|      | D. magna[3]                                | 48-h       | EC50        | 123                     |
|      | M. macrocopa[3]                            | 48-h       | EC50        | 54.8                    |
|      | <b>Dreissena polymorpha[4]</b>             | <b>3-d</b> | <b>NOEC</b> | <b>0.00029</b>          |
| SMX  | Hydra attenuata[1]                         | 96-h       | LC50        | >100                    |
|      | Chlorella vulgaris[1]                      | 48-h       | EC50        | 0.98                    |
|      | Ceriodaphnia dubia[5]                      | 8-d        | NOEC        | 0.14                    |
|      | Scenedesmus vacuolatus[6]                  |            | EC50        | 1.54                    |
|      | Lemna minor[6]                             |            | EC50        | 0.21                    |
|      | Daphnia magna[7]                           | 48-h       | EC50        | 123.1                   |
|      | M. macrocopa[7]                            | 48-h       | EC50        | 70.4                    |
|      | <b>Lemna gibba[8]</b>                      | <b>7-d</b> | <b>NOEC</b> | <b>0.0094</b>           |
| IBU  | Hydra attenuata[1]                         | 96-h       | LC50        | 22.36                   |
|      |                                            | 96-h       | EC50        | 1.65                    |
|      | Daphnia magna[9]                           | 48-h       | LC50        | 132.6                   |
|      |                                            | 21-d       | NOEC        | 20                      |
|      | <b>Oryzias latipes[10]</b>                 |            | <b>NOEC</b> | <b>0.00001</b>          |
| TCS  | Chironomus tentans[11]                     | 10-d       | LC50        | 0.4                     |
|      | Ceriodaphnia dubia[6]                      | 24-h       | LC50        | 0.2                     |
|      | Pimephales promelas[6]                     | 24-h       | LC50        | 0.36                    |
|      | <b>Pseudokirchneriella subcapitata[12]</b> | <b>3-d</b> | <b>NOEC</b> | <b>0.0002</b>           |
| CAF  | Hydra attenuata[1]                         | 96-h       | LC50        | >100                    |
|      | Algae[13]                                  | 48-h       | EC50        | 805                     |
|      | Invertebrate[13]                           | 48-h       | EC50        | 46                      |
|      | Fish[13]                                   | 48-h       | EC50        | 46                      |
|      | <b>Salmo salar[14]</b>                     | <b>5-d</b> | <b>NOEC</b> | <b>0.0001</b>           |

## Reference

1. Quinn, B.; Gagné, F.; Blaise, C. An investigation into the acute and chronic toxicity of eleven pharmaceuticals (and their solvents) found in wastewater effluent on the cnidarian, *Hydra attenuata*. *Science of the total environment*, 2008, 389(2-3): 306-314.
2. Ando, T.; Nagase, H.; Eguchi, K.; Hirooka, T.; Nakamura, T.; Miyamoto, K.; Hirata, K. A novel method using cyanobacteria for ecotoxicity test of veterinary antimicrobial agents. *Environmental Toxicology and Chemistry: An International Journal*, 2007, 26(4): 601-606.
3. Choi, K.; Kim, Y.; Jung, J.; Kim, M. H.; Kim, C. S.; Kim, N. H.; Park, J. Occurrences and ecological risks of roxithromycin, trimethoprim, and chloramphenicol in the Han River, Korea. *Environmental Toxicology and Chemistry: An International Journal*, 2008, 27(3): 711-719.
4. Parolini, M.; Pedriali, A.; Binelli, A. Application of a biomarker response index for ranking the toxicity of five pharmaceutical and personal care products (PPCPs) to the bivalve *Dreissena polymorpha*. *Archives of environmental contamination and toxicology*, 2013, 64(3): 439-447.
5. Ding, T. D.; Li, W.; Kan, X. L.; Li, J. Y. Research advances on the pollution of pharmaceutical and personal care products (PPCPs) in natural waters and their toxicity to freshwater algae. *Ying Yong Sheng tai xue bao= The Journal of Applied Ecology*, 2019, 30(9): 3252-3264.
6. Białk-Bielińska, A.; Stolte, S.; Arning, J.; Uebers, U.; Bösch, A.; Stepnowski, P.; Matzke, M. Ecotoxicity evaluation of selected sulfonamides. *Chemosphere*, 2011, 85(6):928-933.
7. Park, S.; Choi, K. Hazard assessment of commonly used agricultural antibiotics on aquatic ecosystems. *Ecotoxicology*, 2008, 17(6), 526-538.
8. Brain, R. A.; Ramirez, A. J.; Fulton, B. A.; Chambliss, C. K.; Brooks, B. W. Herbicidal Effects of Sulfamethoxazole in *Lemna gibba*: Using p-Aminobenzoic Acid As a Biomarker of Effect. *Environmental Science & Technology*, 2008, 42(23), 8965-8970.
9. Han, G. H.; Hur, H. G.; Kim, S. D. Ecotoxicological risk of pharmaceuticals from wastewater treatment plants in Korea: Occurrence and toxicity to *Daphnia magna*. *Environmental Toxicology and Chemistry*, 2006, 25(1), 265-271.
10. Han, S.; Choi, K.; Kim, J.; Ji, K.; Kim, S.; Ahn, B.; Yun, J.; Choi, K.; Kjim, J.S.; Zhang, X., et al. Endocrine disruption and consequences of chronic exposure to ibuprofen in Japanese medaka (*Oryzias latipes*) and freshwater cladocerans *Daphnia magna* and *Moina macrocopa*. *Aquatic Toxicology*, 2010, 98(3):256-264.
11. Dussault, È. B.; Balakrishnan, V. K.; Sverko, E. D.; Solomon, K. R.; Sibley, P. K. "Toxicity of human pharmaceuticals and personal care products to benthic invertebrates." *Environmental Toxicology and Chemistry: An International Journal* 27.2 (2008): 425-432.
12. Yang, L. H.; Ying, G. G.; Su, H. C.; Stauber, J. L.; Adams, M. S.; & Binet, M. T. Growth-inhibiting effects of 12 antibacterial agents and their mixtures on the freshwater microalga *Pseudokirchneriella subcapitata*. *Environmental Toxicology & Chemistry*, 2010, 27(5):1201-1208.
13. Pan, X.; Qiang, Z.; Wang, W. Distribution and ecological risk of sedimentary PPCPs in the eastern drinking water source area of Chaohu Lake. *Environmental Chemistry*, 2016, 35(11), 2234-2244.
14. Lower, N. The effects of contaminants on various life-cycle stages of Atlantic salmon (*Salmo salar* L.) (Doctoral dissertation, University of Portsmouth), 2008.
